# Supplementary material
Source: Springer Nature journal article supplement (https://www.springermedizin.de/resource/supplementary/13024_2011_224_MOESM6_ESM.pdf/9643690)

**Noc (no wash)**

**Noc (20min)**

**Ctrl**

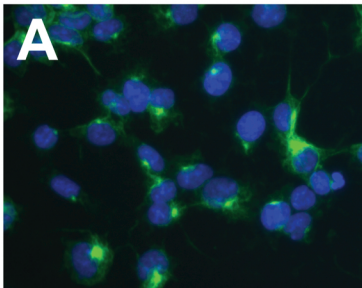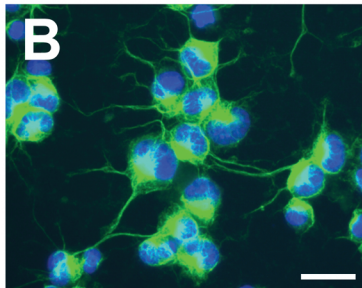

**p35**

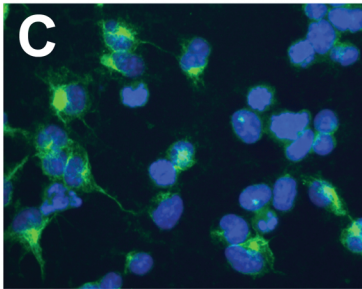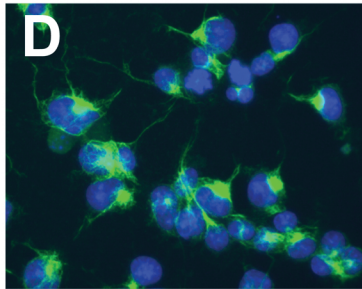

**E**

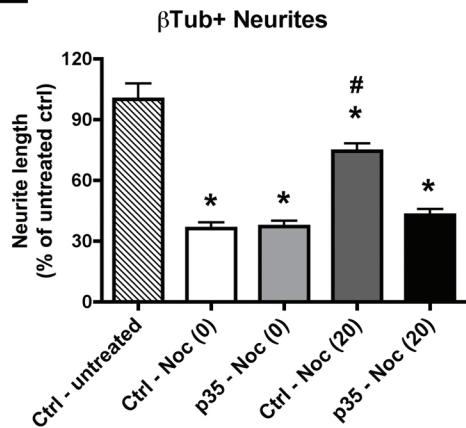

Supplement: MOESM6 [file 9643690]
